# Supplementary material for: Stabilizing intramolecular cobalt–imidazole coordination with a remote methyl group in the backbone of a cofactor B12–protein model
Source: Royal Society of Chemistry journal article supplement (doi:10.1039/c8dt01298a), 2018-01-01
Supplement: c8dt01298a1.pdf [file c8dt01298a1.pdf]

## Supporting Information for

# Stabilizing Intramolecular Cobalt-Imidazole Coordination with a Remote Methyl Group in the Backbone of a Cofactor B<sub>12</sub>- Protein Model

Dr. Marjorie Sonnay, and PD Dr. Felix Zelder\*

### Contents

|                                                          |          |
|----------------------------------------------------------|----------|
| <b>Material and Methods</b>                              | <b>2</b> |
| <b>Schemes S1 and S2</b>                                 | <b>3</b> |
| <b>Experimental Procedure for compound 5<sup>+</sup></b> | <b>4</b> |
| <b>Table S1: Comparison of NMR chemical shift values</b> | <b>5</b> |
| <b>References</b>                                        | <b>6</b> |

## Materials and Methods

All chemicals were of reagent grade and used without further purification. Deuterated solvents were obtained from *Armar Chemicals* (Döttingen, Switzerland). Solvents for HPLC and UPLC were of the corresponding grade. Compounds **4<sup>+</sup>**, **6** and **7** were synthesized as described elsewhere.<sup>S1, 2</sup> Compounds **4<sup>+</sup>** and **5<sup>+</sup>** were obtained as CF<sub>3</sub>COO<sup>-</sup> (TFA) salts after preparative HPLC. The dicyano derivatives **4-CN** and **5-CN** were obtained by addition of 1 eq. of KCN after purification of the compounds.

HPLC solvents were of an aq. soln. of CF<sub>3</sub>COO<sup>-</sup> (0.1%; A) and CH<sub>3</sub>OH (B). UPLC solvents were of an aq. soln. of HCOO<sup>-</sup> (0.1%; C) and CH<sub>3</sub>CN (D). Analytical HPLC analyses were performed on a *Merck-Hitachi L-7000* system equipped with a diode array UV-Vis spectrometer. *Macherey Nagel Nucleosil C18ec RP* column (5 μm particle size, 100 Å pore size, 250 x 3 mm. Flow rate: 0.5 mL min<sup>-1</sup>) was used as column. UPLC-MS spectra were recorded on an *Acquity Waters* system equipped with a PDA detector and an autosampler using an *ACQUITY UPLC BEH C18 Gravity* 1.7 μm (2.1 mm × 50 mm) reverse phase column. The UPLC system was connected to a *Bruker Daltonics HCT ESI-MS* spectrometer. A total volume of 1 μL of a sample soln. was analysed. UPLC gradient was: 0.0-0.5 min 5% D vs. C. 0.5-2.0 min 5-30% D vs. C. 2.0-4.0 min 30-100% D vs. C. Preparative HPLC separations were performed on a *Varian Prostar* system equipped with two *Prostar 215* pumps, a *Prostar 320 UV/Vis* detector and *Macherey Nagel Nucleosil C-18ec RP* column (7 μm particle size, 100 Å pore size, 250 x 21 mm. Flow rate: 18 mL min<sup>-1</sup>) was used as column. Preparative gradient was: 0-3 min 25% B vs. A. 3-30 min 25-100%B vs. A.

NMR spectra were recorded on a *Bruker AV-500* spectrometer (Karlsruhe, Germany). For <sup>1</sup>H-NMR, the chemical shifts are given in ppm relative to the signal from the deuterated solvent. Coupling constants *J* are given in Hz. For <sup>13</sup>C-NMR, the chemical shifts are given in ppm relative to (trimethylsilyl)propionic acid sodium salt.

High-resolution electrospray mass spectra were recorded on a *Bruker maXis QTOF-MS* instrument (*Bruker Daltonics GmbH*, Bremen, Germany). The samples were dissolved in CH<sub>3</sub>OH and analyzed via continuous flow injection at 3 μL/min. The mass spectrometer was operated in positive ion mode with a capillary voltage of 4 kV, an endplate offset of –

500 V, nebulizer pressure of 5.8 psig, and a drying gas flow rate of 4 L/min at 180°C. The instrument was calibrated with a sodium formate solution (H<sub>2</sub>O (500 μL): iPrOH (500 μL): HCOOH (20 μL): an aq. soln. of NaOH (0.1 M; 20 μL). The resolution was optimized at 30'000 FWHM in the active focus mode. The accuracy was better than 2 ppm in a mass range between m/z 118 and 1600.

**Scheme S1.** Synthesis of **5<sup>+</sup>** (A. DMAP, EDC, DMF, 0°C).

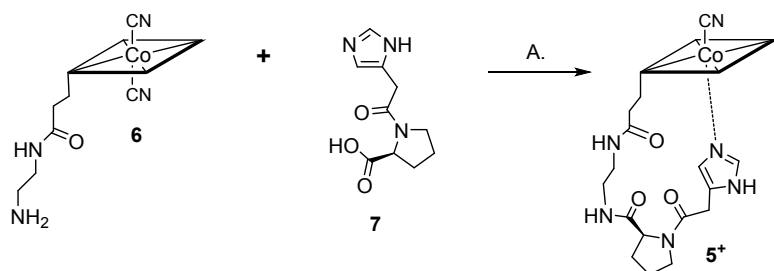

**Scheme S2.** Atom Numbering of **5<sup>+</sup>**.

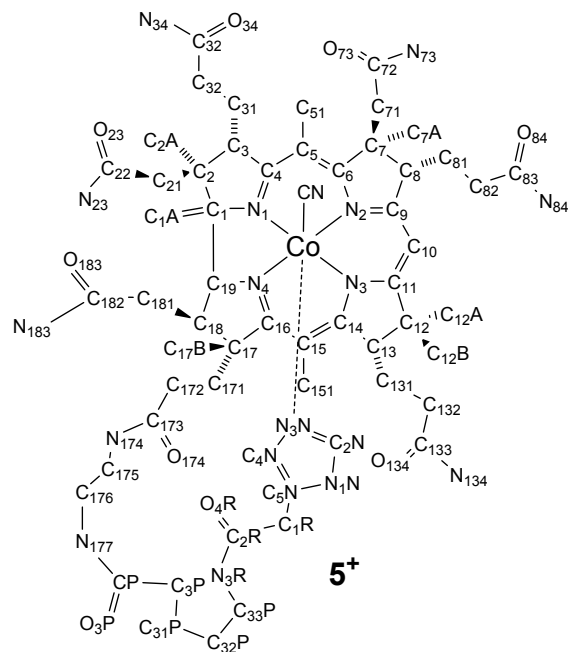

## Experimental Procedures:

**Compound 5<sup>+</sup>** (as CF<sub>3</sub>COO<sup>-</sup> salt): Compound **7<sup>S2</sup>** (19.7 mg, 88.0 μmol) was dissolved in DMF (5 mL) and cooled down to 0°C. DMAP (10.7 mg, 88.0 μmol) was then added. After 10 min, the soln. was added to a soln. of **6<sup>S1</sup>** (20 mg, 17.6 μmol) in dry DMF (8 mL). After 30 min, EDC (13.7 mg, 88.0 μmol) was added. The mixture was let to react for 18h at 24°C. It was quenched with H<sub>2</sub>O (15 mL) and washed with 3 portions of CH<sub>2</sub>Cl<sub>2</sub> (20 mL). Purification of the crude mixture was performed with preparative HPLC to afford the product as a mixture of **5<sup>+</sup>** and **5-OH<sub>2</sub><sup>+</sup>** (6.7 mg, yield: 29 %). To obtain the base-on form **5<sup>+</sup>**, the solid was dissolved in H<sub>2</sub>O (6 mL) and converted with KCN to the corresponding dicyano-derivative **5-CN**. The pH of the soln. was then lowered to 3.8 with an aq. soln. of HCl (1 M) and the reaction was stirred at 24°C for 24h. The solvent was then removed under reduced pressure to afford a pink powder.

HR-MS: [M+H]<sup>2+</sup> calculated for C<sub>58</sub>H<sub>83</sub>CoN<sub>16</sub>O<sub>9</sub>: 603.29250, found 603.29267

UV-Vis: (0.2 M KCl) λ<sub>max</sub> / nm (log ε) = 555 (3.95); 523 (3.92); 411 (3.56); 362 (4.46); 321 (3.93); 306 (4.00); 278 (4.09)

UPLC-MS: m/z = 1205.7 [M]<sup>+</sup> 603.8 [M+H]<sup>2+</sup>, R<sub>t</sub> = 1.9 min.

<sup>1</sup>H-NMR of **5-CN**: (500 MHz, D<sub>2</sub>O) δ / ppm = 7.73 (s, 1H), 7.05 (s, 1H), 5.92 (s, 1H), 4.43 (dd, J = 8.7, 4.1 Hz, 1H), 3.86 (d, J = 8.6 Hz, 1H), 3.79 (s, 2H), 3.78-3.64 (m, 3H), 3.43 (dd, J = 7.1, 4.9 Hz, 1H), 3.41 – 3.26 (m, 5H), 2.90 (s, 1H), 2.78 - 2.69 (m, 2H), 2.65 - 2.39 (m, 5H), 2.29 - 2.31 (m, 4H), 2.31 - 2.23 (m, 9H), 2.23 – 2.05 (m, 4H), 2.05 - 1.92 (m, 5H), 1.91 - 1.74 (m, 3H), 1.71 (s, 3H), 1.55 (s, 3H), 1.49 (s, 3H), 1.46 (s, 3H), 1.33 (s, 3H), 1.21 (s, 3H).

<sup>13</sup>C-NMR of **5-CN**: (126 MHz, D<sub>2</sub>O) δ / ppm = 181.6, 181.5, 181.1, 180.0, 180.5, 180.0, 179.6, 178.8, 175.3, 175.2, 166.5, 166.1, 165.9, 165.8, 139.0, 134.6, 121.9, 119.9, 118.2, 115.9, 110.8, 108.1, 94.8, 86.1, 77.8, 63.6, 61.2, 59.1, 57.8, 56.0, 51.1, 51.0, 49.8, 49.3, 46.5, 45.0, 41.7, 41.6, 41.4, 37.6, 35.8, 35.4, 35.2, 34.7, 34.6, 34.4, 33.0, 32.6, 29.4, 28.4, 27.6, 27.3, 23.4, 21.5, 20.1, 19.2, 17.7, 17.4.

**Table S1:** Comparison of NMR chemical shift values for **4-CN**<sup>S2</sup> and **5-CN**.<sup>a</sup>

|      | <b>4-CN</b>    |                 | <b>5-CN</b>    |                 |
|------|----------------|-----------------|----------------|-----------------|
|      | <sup>1</sup> H | <sup>13</sup> C | <sup>1</sup> H | <sup>13</sup> C |
| C1   |                | 85.9            |                | 86.1            |
| C1A  | 1.49           | 24.5            | 1.49           | 23.4            |
| C2   |                | 49.1            |                | 49.3            |
| C2A  | 1.55           | 19.3            | 1.55           | 19.2            |
| C3   | 3.87           | 59.2            | 3.86           | 59.1            |
| C4   |                | 179.7           |                | 179.6           |
| C5   |                | 108             |                | 108.1           |
| C6   |                | 166             |                | 166.1           |
| C7   |                | 49.0            |                | 51.0            |
| C7A  | 1.72           | 21.5            | 1.71           | 21.5            |
| C8   | 3.41           | 59.1            | 3.43           | 57.8            |
| C9   |                | 174.9           |                | 175.2           |
| C10  | 5.93           | 93.9            | 5.92           | 93.8            |
| C11  |                | 180.4           |                | 180.5           |
| C12  |                | 49.5            |                |                 |
| C12A | 1.46           | 21.3            | 1.46           | 21.5            |
| C12B | 1.22           | 33.2            | 1.21           | 33.0            |
| C13  | 3.32           | 56              | 3.32           | 56.0            |
| C14  |                | 166.3           |                | 165.9           |
| C15  |                | 105.9           |                | 108.1           |
| C16  |                | 180.1           |                | 180.0           |
| C17  |                | 61.6            |                | 61.2            |
| C17B | 1.33           | 20.2            | 1.32           | 20.1            |
| C18  | 2.89           | 41.7            | 2.9            | 41.7            |
| C19  | 3.74           | 77.9            | 3.75           | 77.8            |
| C21  | 2.32/2.26      | 45              | 2.32/2.28      | 45.0            |
| C31  | 2.24/1.98      | 27.7            | 2.29/1.99      | 27.6            |
| C32  | 2.55/2.46      | 37.7            | 2.57/2.49      | 37.6            |
| C51  | 2.25           | 18              | 2.28           | 17.7            |
| C71  | 2.58/2.27      | 46.5            | 2.60/2.29      | 46.5            |
| C81  | 2.12/1.79      | 29.4            | 2.13/1.83      | 29.4            |
| C82  | 2.26/1.93      | 32.7            | 2.28/1.95      | 32.6            |
| C131 | 2.08/1.86      | 28.4            | 2.13/1.88      | 28.4            |
| C132 | 2.16/2.09      | 24.6            | 2.30/2.20      | 34.6            |

|      |            |       |           |       |
|------|------------|-------|-----------|-------|
| C151 | 2.27       | 17.6  | 2.33      | 17.4  |
| C172 | 2.44/1.85  | 35.5  | 2.44/1.87 | 35.4  |
| C175 | 3.32       | 46.4  | 3.36      | 41.4  |
| C176 | 4.05       | 48.4  | 3.36      | 41.6  |
| C177 | 1.12       | 19.7  |           |       |
| C181 | 2.73       | 35.2  | 2.74      | 35.2  |
| C3P  | 4.64/4.40  | 63.8  | 4.65/4.41 | 63.6  |
| C31P | 2.28       | 34.7  | 2.39/2.30 | 34.7  |
| C32P | 1.97       | 27.1  | 2.00      | 27.6  |
| C33P | 3.76 /3.70 | 51.1  | 3.71      | 51.1  |
| C1R  | 3.80       | 35.6  | 3.79      | 35.8  |
| C2R  |            | 175.2 |           | 175.3 |
| C2N  | 7.75       | 139   | 7.74/7.73 | 139.9 |
| C4N  | 7.06/7.04  | 119.8 | 7.05/7.02 | 119.9 |
| C5N  |            | 134.2 |           | 134.6 |

<sup>a</sup>Assignment by <sup>1</sup>H-NMR, <sup>13</sup>C-NMR, <sup>1</sup>H,<sup>1</sup>H ROESY, <sup>1</sup>H,<sup>13</sup>C-HSQC correlation and comparison with **4**<sup>+</sup>.<sup>S2</sup>

## References

- S1. K. Zhou and F. Zelder, *Angew. Chem. Int. Ed.*, 2010, **49**, 5178-5180.  
 S2. M. Sonnay, T. Fox, O. Blacque and F. Zelder, *Chem. Sci.*, 2016, **7**, 3836-3842.
